# Supplementary material for: Interface and defect engineering of hybrid nanostructures toward an efficient HER catalyst
Source: Royal Society of Chemistry journal article supplement (doi:10.1039/c9nr01321k), 2019-01-01
Supplement: c9nr01321k1.pdf [file c9nr01321k1.pdf]

### Supporting Information

|         |        |       |     |     |     |
|---------|--------|-------|-----|-----|-----|
| GO:AB   | 1:0.25 | 1:0.5 | 1:1 | 1:2 | 1:4 |
| CNTs:AB | 1:0.25 | 1:0.5 | 1:1 | 1:2 | 1:4 |

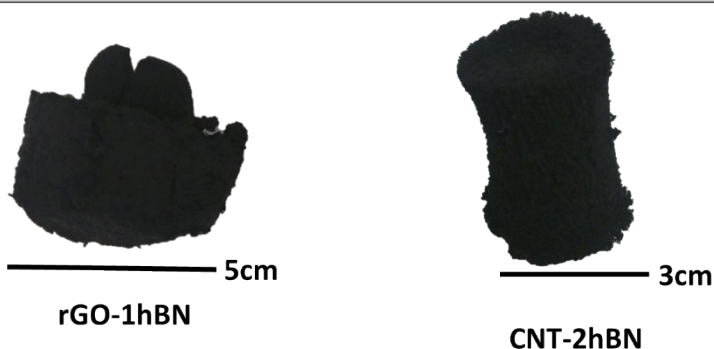

Density Calculation:

The density of rGO-1hBN and CNTs-2hBN were calculated using the following formula for cylinder shape.

$$\rho = \frac{m}{\pi r^2 h}$$

Where,  $\rho$  is the density,  $m$  is the mass,  $r$  is the radius and  $h$  is the height.

rGO-1hBN

$$\rho = 158 \text{mg} / (\pi * 2.5^2 \text{cm} * 2.3 \text{cm}) = 3.49 \text{mg/cm}^3$$

CNT-2hBN

$$\rho = 182 \text{mg} / (\pi * 1.5^2 \text{cm} * 5.2 \text{cm}) = 4.95 \text{mg/cm}^3$$

**Figure S1.** The ratio of CNS and Ammonia borane (AB) for fabrication of CNS-hBN heterostructures and 3D porous structure of rGO-1hBN and CNTs-2hBN.

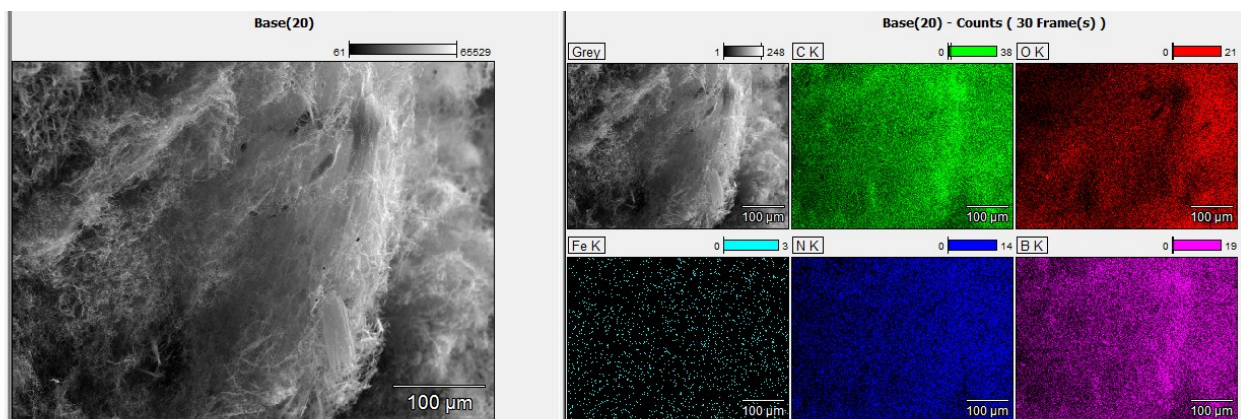

**Figure S2.** EDAX characterization of CNTs-BN structures that shows homogenous distribution of hBN.

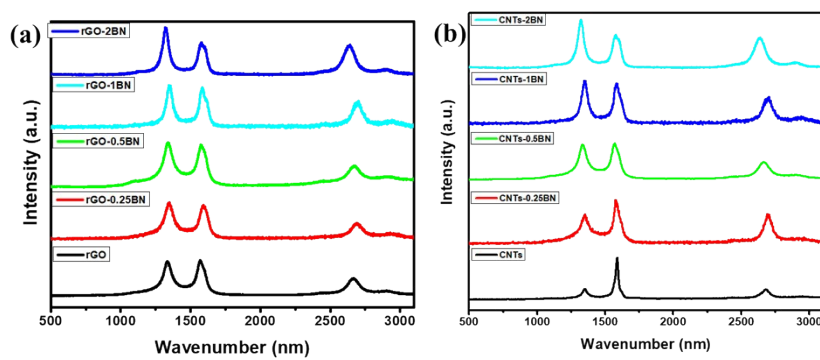

**Figure S3.** Raman spectra of all ratio of CNS-BN structures.

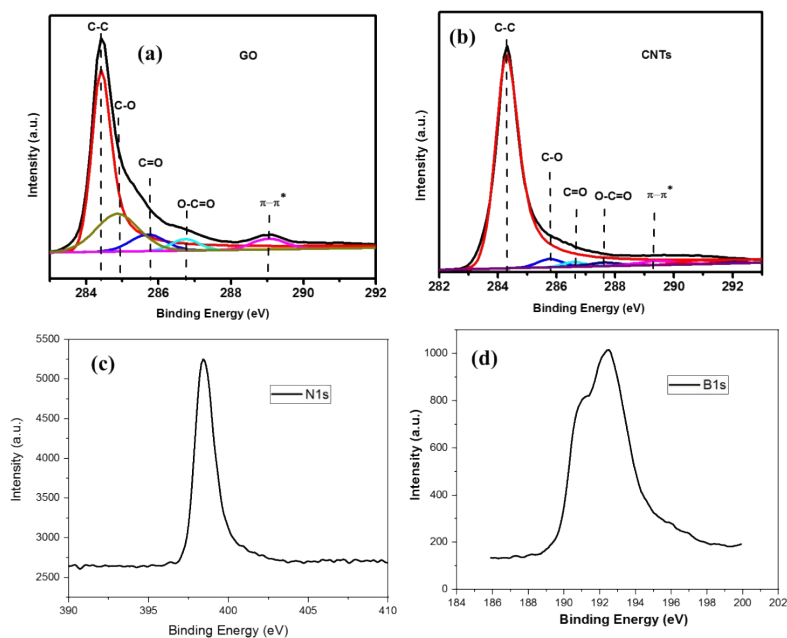

**Figure S4.** XPS spectra of (a) GO and (b) CNTs, (c-d) binding energies of N1s and B1s

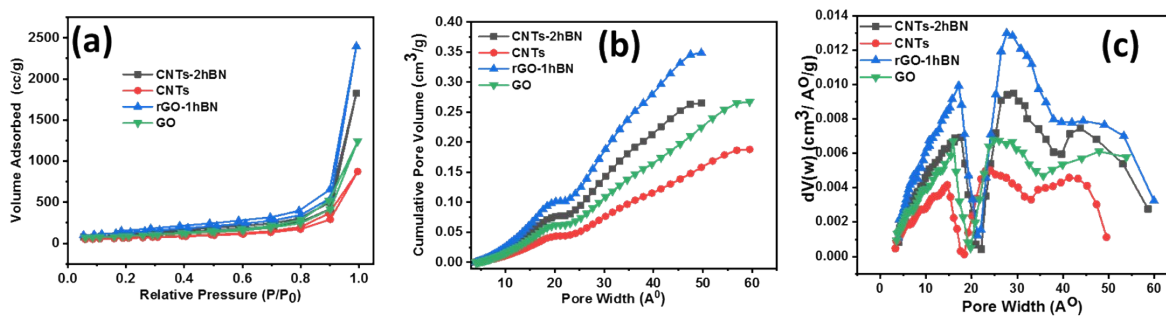

**Figure S5.** BET surface area analysis of CNTs, CNTs-2hBN, GO and rGO-1hBN (a) The  $N_2$  adsorption isotherm of pristine (b) Cumulative pore volume as a function of pore size, (c) DFT method pore size distribution.

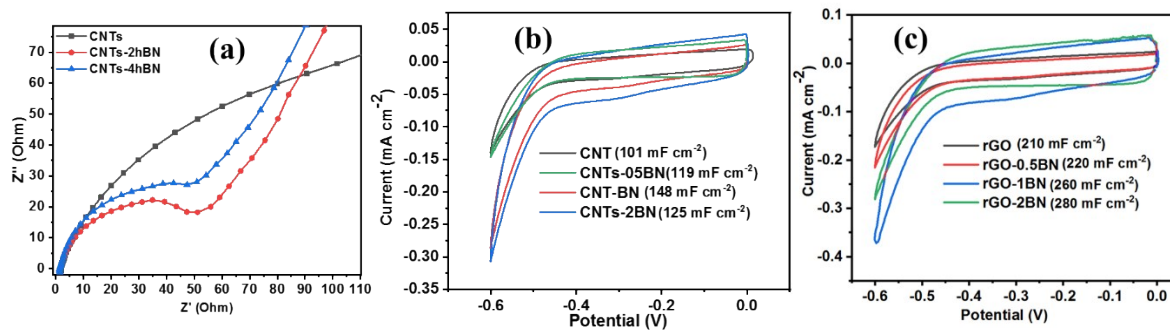

Figure S6. (a) Nyquist plots of EIS of CNTs, CNTs-2hBN and CNTs-4hBN, (b) CV curves of (b) CNTs and CNTs-hBN and (c) rGO and rGO-hBN structures.

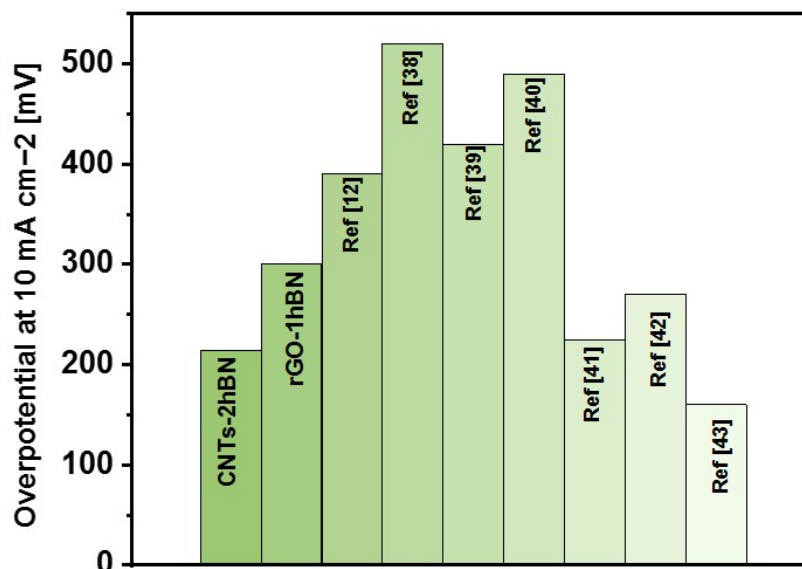

Figure S7. The comparison of HER performance of CNTs-2hBN and rGO-1hBN with some catalysis reported in the literature.

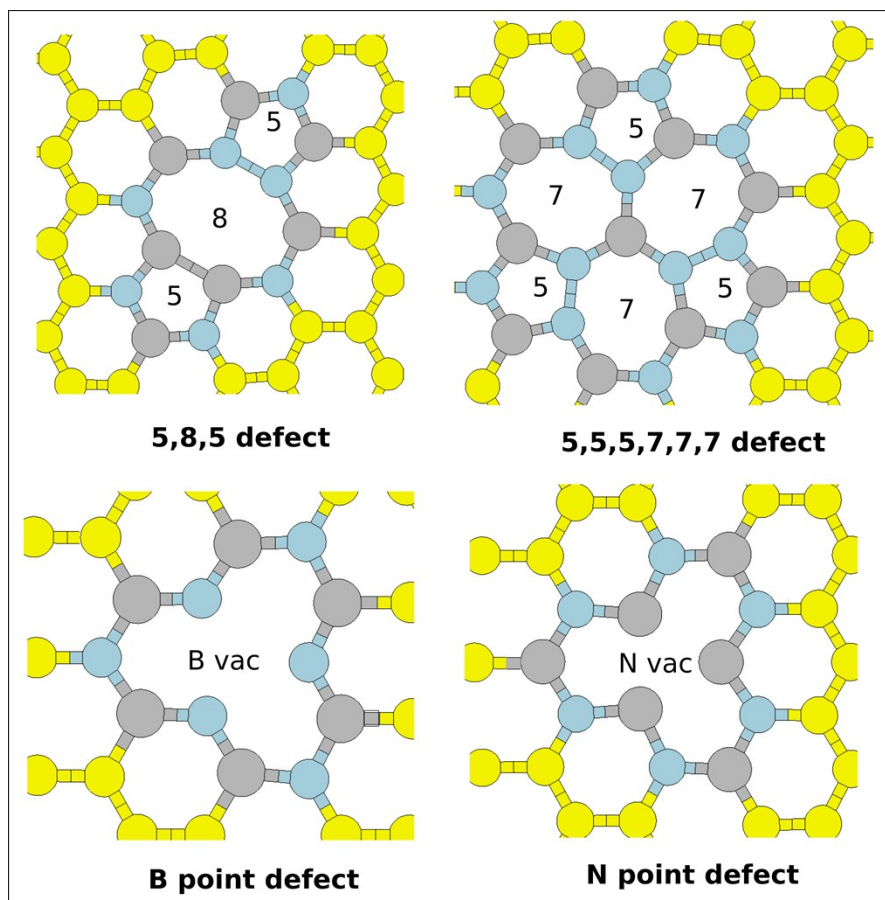

**Figure S8:** Defected structures of BN doped graphene, referred to in figure 5.
